# Supplementary material for: Rapid Detection of Pityophthorus juglandis (Blackman) (Coleoptera, Curculionidae) with the Loop-Mediated Isothermal Amplification (LAMP) Method
Source: MDPI journal article supplement (doi:10.3390/plants10061048), 2021-05-22
Supplement: s1 [file s1]

## Article

# Rapid Detection of *Pityophthorus Juglandis* (Blackman) (Coleoptera, Curculionidae) with the Loop-Mediated Isothermal Amplification (LAMP) Method

Domenico Rizzo <sup>1</sup>, Salvatore Moricca <sup>2,\*</sup>, Matteo Bracalini <sup>2</sup>, Alessandra Benigno <sup>2</sup>, Umberto Bernardo <sup>3</sup>, Nicola Luchi <sup>4</sup>, Daniele Da Lio <sup>5</sup>, Francesco Nugnes <sup>3</sup>, Giovanni Cappellini <sup>1</sup>, Chiara Salemi <sup>5</sup>, Santa Olga Cacciola <sup>6</sup> and Tiziana Panzavolta <sup>2</sup>

## Supplementary:

**Table S1.** Tamp means  $\pm$ SD for adult and frass samples of *P. juglandis*.

| N° | Description                | Tamp Means | SD   | N° | Description                | Tamp Means | SD   | Mean Melting Temperatures (°C) | SD   |
|----|----------------------------|------------|------|----|----------------------------|------------|------|--------------------------------|------|
| 1  | <i>P. juglandis</i> _adult | 6.06       | 0.02 | 1  | <i>P. juglandis</i> _frass | 12.26      | 0.70 | 90.75                          | 0.35 |
| 2  | <i>P. juglandis</i> _adult | 6.06       | 0.04 | 2  | <i>P. juglandis</i> _frass | 12.90      | 1.20 | 91.00                          | 0.00 |
| 3  | <i>P. juglandis</i> _adult | 6.04       | 0.07 | 3  | <i>P. juglandis</i> _frass | 13.30      | 1.69 | 91.00                          | 0.00 |
| 4  | <i>P. juglandis</i> _adult | 6.23       | 0.16 | 4  | <i>P. juglandis</i> _frass | 12.63      | 2.60 | 90.50                          | 0.00 |
| 5  | <i>P. juglandis</i> _adult | 6.18       | 0.08 | 5  | <i>P. juglandis</i> _frass | 13.23      | 1.64 | 90.50                          | 0.00 |
| 6  | <i>P. juglandis</i> _adult | 6.22       | 0.05 | 6  | <i>P. juglandis</i> _frass | 12.29      | 0.74 | 91.00                          | 0.00 |
| 7  | <i>P. juglandis</i> _adult | 6.17       | 0.11 | 7  | <i>P. juglandis</i> _frass | 12.88      | 1.08 | 90.75                          | 0.35 |
| 8  | <i>P. juglandis</i> _adult | 6.24       | 0.08 | 8  | <i>P. juglandis</i> _frass | 13.31      | 1.69 | 90.75                          | 0.35 |
| 9  | <i>P. juglandis</i> _adult | 6.38       | 0.02 | 9  | <i>P. juglandis</i> _frass | 13.33      | 1.66 | 91.00                          | 0.00 |
| 10 | <i>P. juglandis</i> _adult | 6.32       | 0.04 | 10 | <i>P. juglandis</i> _frass | 12.54      | 1.22 | 91.00                          | 0.00 |
| 11 | <i>P. juglandis</i> _adult | 6.44       | 0.03 | 11 | <i>P. juglandis</i> _frass | 12.35      | 0.82 | 90.50                          | 0.00 |
| 12 | <i>P. juglandis</i> _adult | 6.17       | 0.08 | 12 | <i>P. juglandis</i> _frass | 12.31      | 0.77 | 90.50                          | 0.00 |
| 13 | <i>P. juglandis</i> _adult | 6.08       | 0.06 | 13 | <i>P. juglandis</i> _frass | 12.88      | 0.90 | 91.00                          | 0.00 |
| 14 | <i>P. juglandis</i> _adult | 6.10       | 0.09 | 14 | <i>P. juglandis</i> _frass | 13.32      | 1.01 | 90.75                          | 0.35 |
| 15 | <i>P. juglandis</i> _adult | 6.42       | 0.12 | 15 | <i>P. juglandis</i> _frass | 13.34      | 0.96 | 91.00                          | 0.00 |
| 16 | <i>P. juglandis</i> _adult | 6.48       | 0.02 | 16 | <i>P. juglandis</i> _frass | 12.54      | 0.92 | 91.00                          | 0.00 |
| 17 | <i>P. juglandis</i> _adult | 6.58       | 0.05 | 17 | <i>P. juglandis</i> _frass | 12.41      | 0.87 | 90.75                          | 0.35 |
| 18 | <i>P. juglandis</i> _adult | 6.24       | 0.04 | 18 | <i>P. juglandis</i> _frass | 12.94      | 0.83 | 91.00                          | 0.00 |
| 19 | <i>P. juglandis</i> _adult | 6.42       | 0.02 | 19 | <i>P. juglandis</i> _frass | 13.32      | 0.79 | 91.00                          | 0.00 |
| 20 | <i>P. juglandis</i> _adult | 6.43       | 0.14 | 20 | <i>P. juglandis</i> _frass | 14.24      | 0.75 | 90.5                           | 0.00 |
| 21 | <i>P. juglandis</i> _adult | 6.45       | 0.02 | 21 | <i>P. juglandis</i> _frass | 13.20      | 0.71 | 90.5                           | 0.00 |
| 22 | <i>P. juglandis</i> _adult | 6.47       | 0.15 | 22 | <i>P. juglandis</i> _frass | 13.23      | 0.67 | 91.00                          | 0.00 |
| 23 | <i>P. juglandis</i> _adult | 6.49       | 0.16 | 23 | <i>P. juglandis</i> _frass | 13.25      | 0.63 | 90.75                          | 0.35 |
| 24 | <i>P. juglandis</i> _adult | 6.51       | 0.08 | 24 | <i>P. juglandis</i> _frass | 13.28      | 0.59 | 91.00                          | 0.00 |

**Table S2.** Tamp means  $\pm$ SD for the samples included in the blind panel.

| N° | Description                                          | Tamp Means | SD   | Mean Melting<br>Temperatures (°C) | SD   |
|----|------------------------------------------------------|------------|------|-----------------------------------|------|
| 1  | <i>P. juglandis</i> _adult                           | 8.78       | 0.32 | 91.00                             | 0    |
| 2  | <i>P. juglandis</i> _adult                           | 8.78       | 0.26 | 91.00                             | 0    |
| 3  | <i>P. juglandis</i> _adult                           | 9.10       | 0.21 | 90.50                             | 0    |
| 4  | <i>P. juglandis</i> _adult                           | 8.24       | 0.06 | 91.00                             | 0    |
| 5  | <i>P. juglandis</i> _adult                           | 8.78       | 0.08 | 91.00                             | 0    |
| 6  | <i>P. juglandis</i> _adult                           | 8.74       | 0.05 | 90.50                             | 0    |
| 7  | <i>P. juglandis</i> _frass                           | 13.20      | 0.02 | 90.75                             | 0.35 |
| 8  | <i>P. juglandis</i> _frass                           | 12.95      | 0.18 | 90.50                             | 0    |
| 9  | <i>P. juglandis</i> _frass                           | 12.89      | 0.12 | 91.00                             | 0    |
| 10 | <i>P. juglandis</i> _frass                           | 12.85      | 0.48 | 91.00                             | 0    |
| 11 | <i>P. juglandis</i> _frass                           | 13.20      | 0.08 | 90.50                             | 0    |
| 12 | <i>P. juglandis</i> _frass                           | 12.98      | 0.24 | 90.50                             | 0    |
| 13 | <i>P. juglandis</i> _frass                           | 12.89      | 0.60 | 91.00                             | 0    |
| 14 | <i>P. juglandis</i> _frass                           | 12.90      | 0.20 | 90.75                             | 0.35 |
| 15 | <i>Pityophthorus pubescens</i> (Marsham)_adult       | n/a        | 0.00 | n/a                               | 0.00 |
| 16 | <i>Ips sexdentatus</i> (Börner)_adult                | n/a        | 0.00 | n/a                               | 0.00 |
| 17 | <i>Ips typographus</i> (Linnaeus)_adult              | n/a        | 0.00 | n/a                               | 0.00 |
| 18 | <i>Orthotomicus erosus</i> (Wollaston)_adult         | n/a        | 0.00 | n/a                               | 0.00 |
| 19 | <i>Hylurgus ligniperda</i> (Fabricius)_adult         | n/a        | 0.00 | n/a                               | 0.00 |
| 20 | <i>Tomicus destruens</i> (Wollaston)_adult           | n/a        | 0.00 | n/a                               | 0.00 |
| 21 | <i>Xyleborinus saxesenii</i> (Ratzeburg)_adult       | n/a        | 0.00 | n/a                               | 0.00 |
| 22 | <i>Xyleborus dispar</i> (Fabricius)_adult            | n/a        | 0.00 | n/a                               | 0.00 |
| 23 | <i>Xyleborus monographus</i> (Fabricius)_adult       | n/a        | 0.00 | n/a                               | 0.00 |
| 24 | <i>Xylosandrus compactus</i> (Eichhoff)_adult        | n/a        | 0.00 | n/a                               | 0.00 |
| 25 | <i>Xylosandrus germanus</i> (Blandford)_adult        | n/a        | 0.00 | n/a                               | 0.00 |
| 26 | <i>Lepturges confluent</i> (Haldeman)_adult          | n/a        | 0.00 | n/a                               | 0.00 |
| 27 | <i>Xylosandrus crassiusculus</i> (Motschulsky)_adult | n/a        | 0.00 | n/a                               | 0.00 |
| 28 | <i>Zeuzera pyrina</i> (Linnaeus)_larva               | n/a        | 0.00 | n/a                               | 0.00 |
| 29 | <i>Xylosandrus compactus</i> (Eichhoff)_frass        | n/a        | 0.00 | n/a                               | 0.00 |
| 30 | <i>Xylosandrus compactus</i> (Eichhoff)_frass        | n/a        | 0.00 | n/a                               | 0.00 |
| 31 | <i>Xylosandrus compactus</i> (Eichhoff)_frass        | n/a        | 0.00 | n/a                               | 0.00 |
| 32 | <i>Xylosandrus compactus</i> (Eichhoff)_frass        | n/a        | 0.00 | n/a                               | 0.00 |
